# Supplementary material for: 3D Printing of Personalized Thick and Perfusable Cardiac Patches and Hearts
Source: PubMed Central journal article supplement (PMC6548966; doi:10.1002/advs.201900344), 2019-04-15
Supplement: ADVS-6-1900344-s002.pdf [file ADVS-6-1900344-s002.pdf]

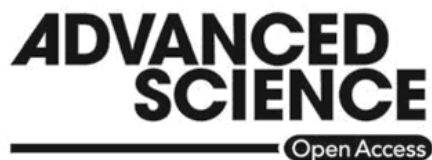

## Supporting Information

for *Adv. Sci.*, DOI: 10.1002/adv.201900344

### 3D Printing of Personalized Thick and Perfusable Cardiac Patches and Hearts

*Nadav Noor, Assaf Shapira, Reuven Edri, Idan Gal, Lior Wertheim, and Tal Dvir\**

Supplementary Information for

## **3D printing of personalized thick and perfusable cardiac patches and hearts**

**Nadav Noor<sup>1,2,†</sup> Assaf Shapira<sup>1,†</sup> Reuven Edri<sup>1,†</sup>, Idan Gal<sup>1</sup>, Lior Wertheim<sup>1,2</sup> and Tal Dvir<sup>1,2,3,4,\*</sup>**

<sup>1</sup>The School for Molecular Cell Biology and Biotechnology, Faculty of Life Sciences, Tel Aviv University, Tel Aviv 6997801, Israel.

<sup>2</sup>Department of Materials Science and Engineering, Faculty of Engineering, Tel Aviv University, Tel Aviv 6997801, Israel.

<sup>3</sup>The Center for Nanoscience and Nanotechnology, Tel Aviv University, Tel Aviv 6997801, Israel

<sup>4</sup>Sagol Center for Regenerative Biotechnology, Tel Aviv University, Tel Aviv 6997801, Israel

†Equal contribution

\*Correspondence to Tal Dvir (tdvir@tauex.tau.ac.il)

### **This PDF file includes:**

Materials and Methods  
Supplement Figures. **1-11**  
Captions for Movies **1 to 18**

### **Other Supplementary Information for this manuscript includes the following:**

Supplementary Movies **1 to 18**

**Supplementary Fig. 1. Modeling of the cardiac patch before and after addition of blood vessels to optimize mass transfer within the printed structure.**

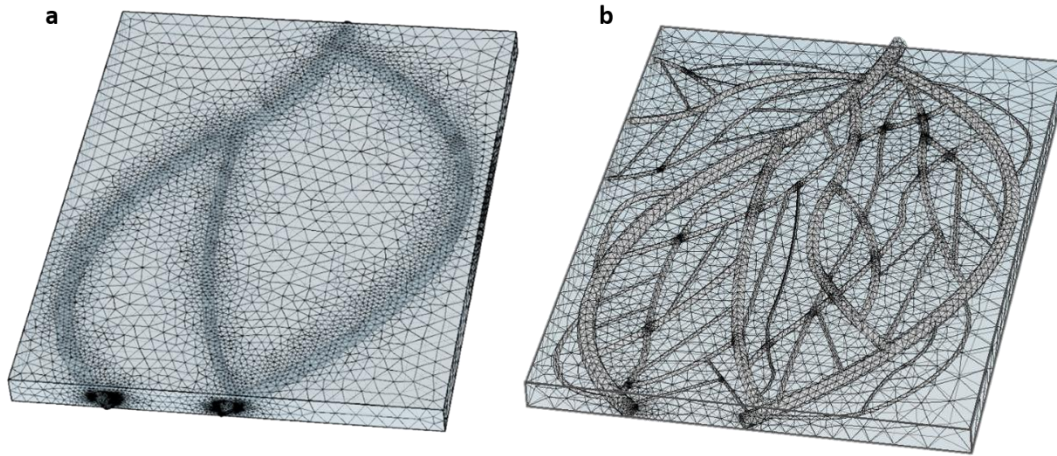

**c**

$$r = \frac{V_{max} \times S}{K_m + S}$$

**d**

$$\frac{dC_a}{dt} + \nabla(-D_o \nabla C_a) = r$$

(a) The mesh used for the mathematical modeling of the patch, based on the anatomical data from the CT images. (b) The mesh of the blood vessels-supplemented model. (c) Michaelis-Menten equation used to calculate oxygen cellular consumption:  $V_{max}$  represents the maximum velocity,  $K_m$  is the substrate concentration at 50% of  $V_{max}$ .  $S$  is the substrate (oxygen) concentration. (d) Mass-balance equation based on Fick's second law:  $C_a$  represents oxygen concentration,  $r$  oxygen consumption rate,  $D_o$  is the diffusion coefficient.

Supplementary Fig. 2. Rheology measurements for the gelatin hydrogel

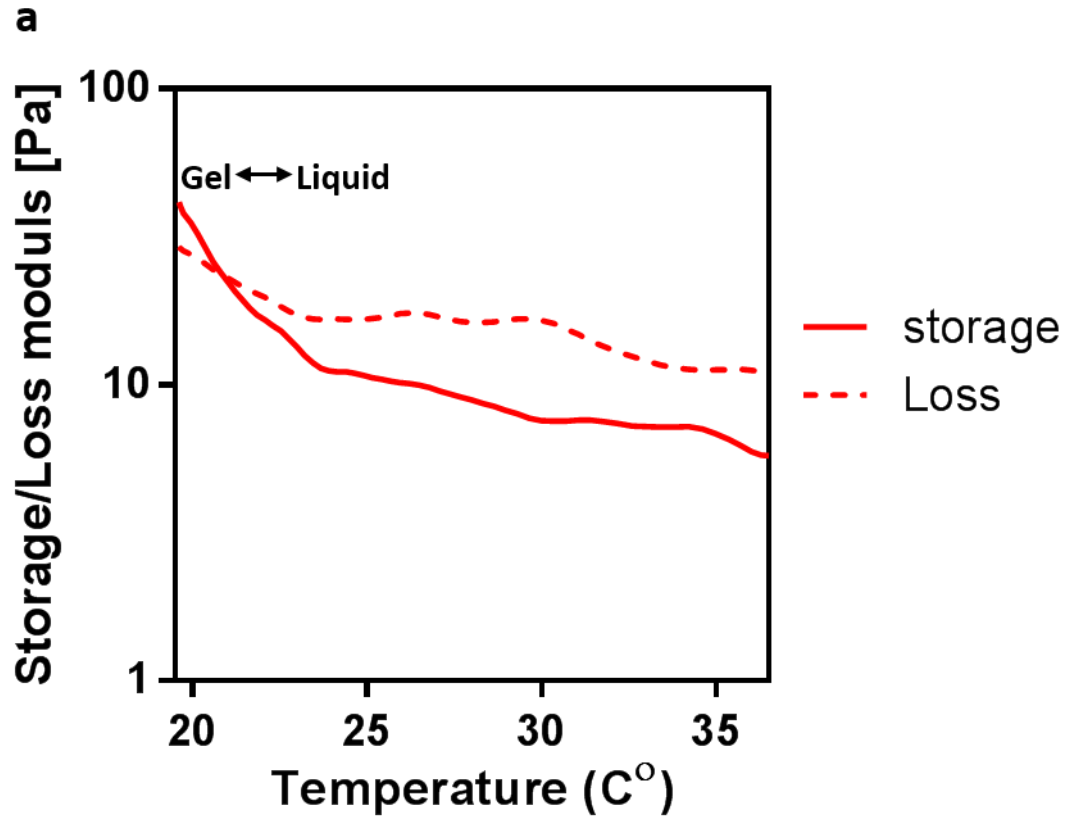

(a) Rheology measurements showing the thermoresponsive quality of the gelatin hydrogel.

**Supplementary Fig. 3. Patch perfusion and structural integrity.**

**a**

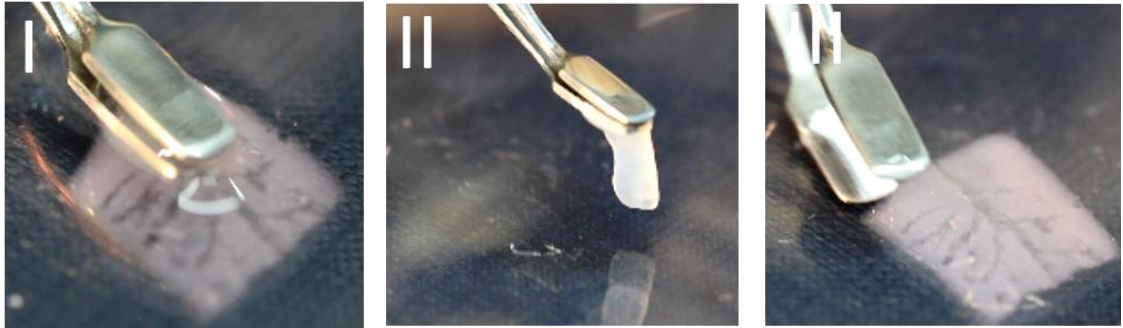

**b**

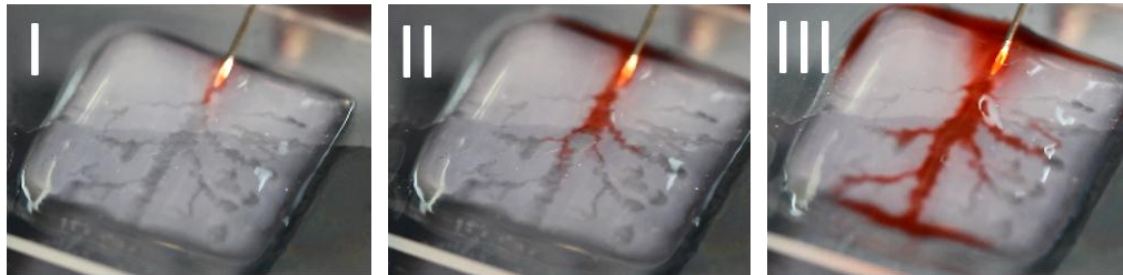

(a) Patch lifting and immersion. (b) Patch perfusion.

**Supplementary Fig. 4. Top view of the printed blood vessel.**

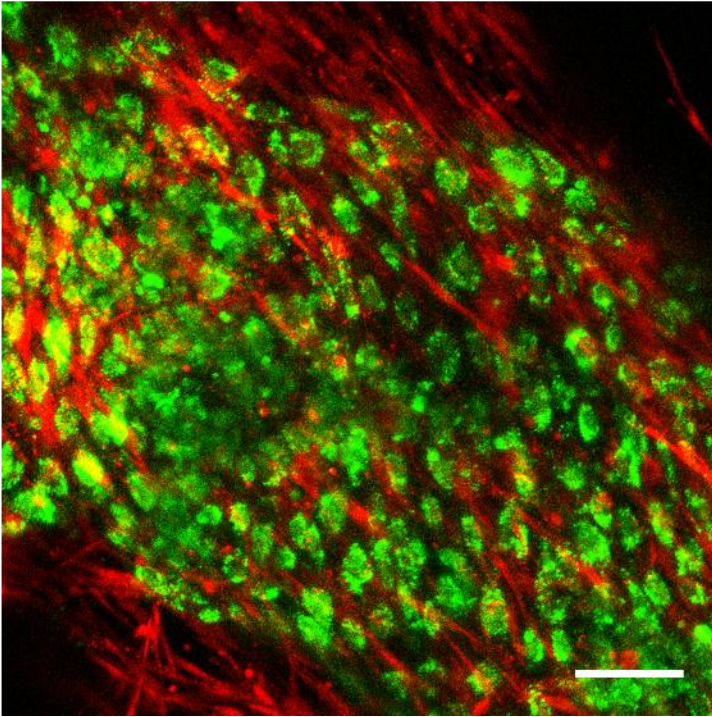

A top view of the printed blood vessel, showing the interactions between the ECs (green) and the HNDFs (red). Scale bar= 100  $\mu\text{m}$ .

**Supplementary Fig. 5. Cross section of the printed explant.**

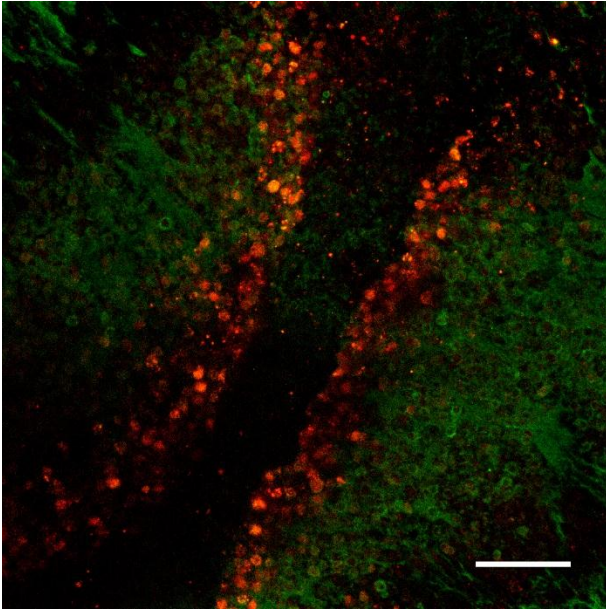

Cross section of the printed explant immunostained against sarcomeric actinin (green). ECs express RFP (red). Scale bar= 100  $\mu$ m.

**Supplementary Fig. 6. The support medium microparticulate material**

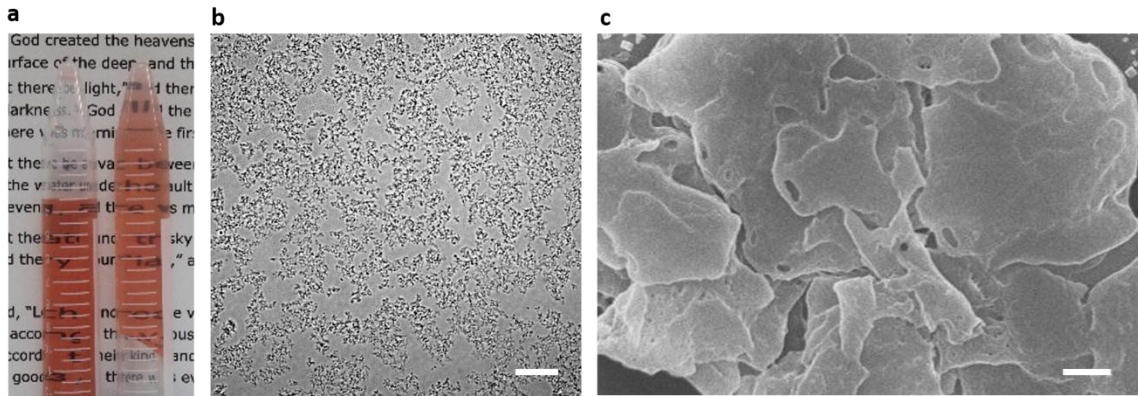

(a) An image showing the transparency of culture medium (left) and the support medium (right). (b) Light microscopy and (c) SEM image of the microparticulate material. Scale bars: b= 50  $\mu\text{m}$ , c= 1  $\mu\text{m}$ .



**Supplementary Fig. 7. A crisscross structure, printed within the support medium.**

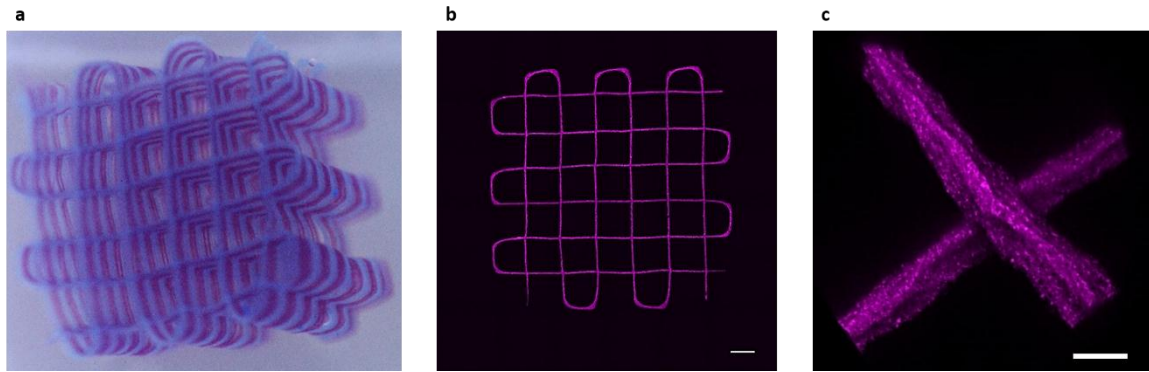

(a) A thick, multi-layered crisscross structure (two colored; red and blue) after extraction from the support medium. (b) A confocal image of a two-layer crisscross structure printed with the personalized hydrogel, and (c) The intersection of two strands. Scale bars: (b)=1 mm, (c)= 100  $\mu\text{m}$ .

Supplementary Fig. 8. Printing scheme of a representative part of the thick lumen-containing construct.

**Granular support**  
**Omentum + CM**  
**Omentum + EC**

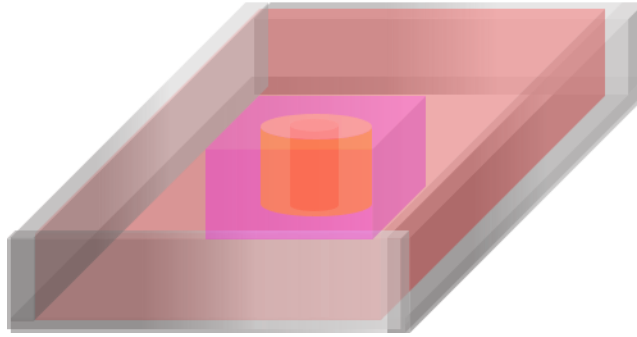

**Supplementary Fig. 9. The printed heart.**

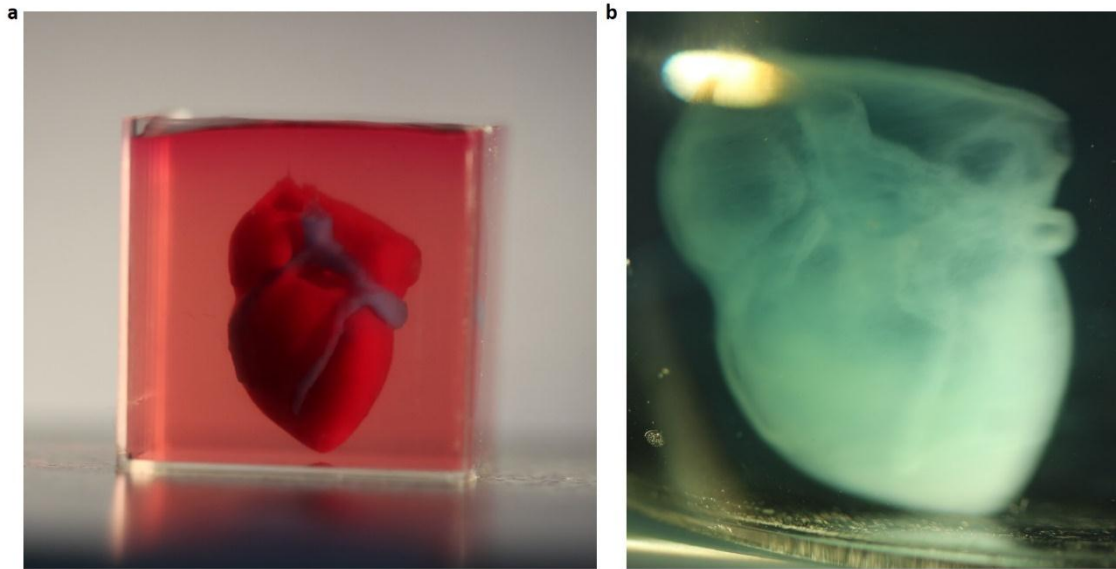

(a) The printed heart in the support medium at the end of the printing process. (b) An extracted heart in PBS.

Supplementary Fig. 10. Compression test of printed hearts.

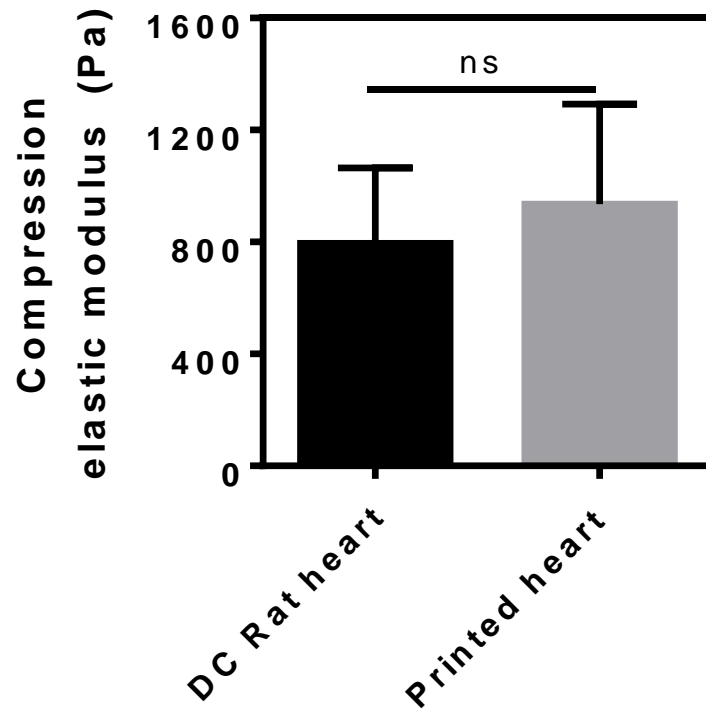

**Supplementary Fig. 11. Human heart model printing program.**

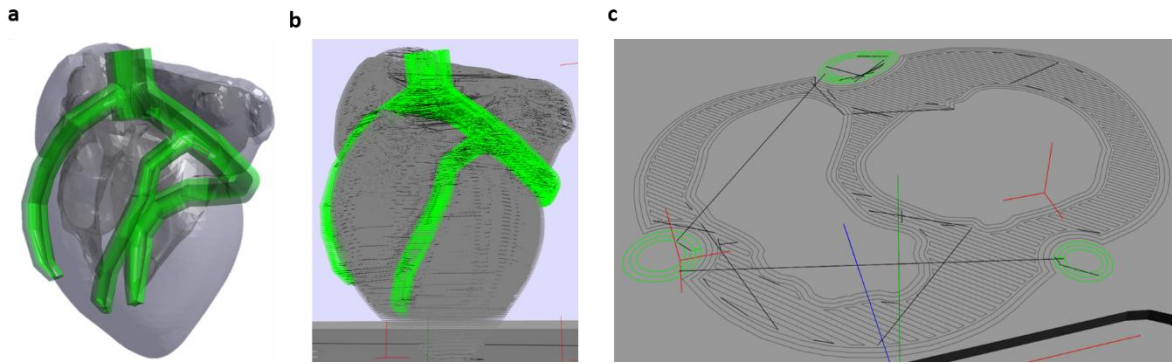

(a) The heart CAD model. (b) The CAD model when sliced by the printing program into layers. (c) One layer of the printing program. (grey – CM bioink, green – EC bioink).

## **Supplementary movies**

### **Supplementary Movie 1.**

3D printing of patient-specific vascularized cardiac patch.

### **Supplementary Movie 2.**

Lift and resuspension of the vascularized patch.

### **Supplementary Movie 3.**

Infusion of red dye into the open lumens of the vascularized cardiac patch.

### **Supplementary Movie 4.**

3D confocal image of a GFP HUVEC (green) and RFP HNDF (red) lumen.

### **Supplementary Movie 5.**

Calcium imaging of a printed vascularized cardiac patch. Scale bar = 100  $\mu\text{m}$ .

### **Supplementary Movie 6.**

Calcium imaging of a printed cardiac patch wide view. Scale bar = 500  $\mu\text{m}$ .

### **Supplementary Movie 7.**

Calcium imaging of a printed cardiac patch near view. Scale bar = 100  $\mu\text{m}$ .

### **Supplementary Movie 8.**

Confocal 3D image of an immunostained section of the cardiac patch, extracted 7 days post transplantation, actinin (red), nuclei (blue).

### **Supplementary Movie 9.**

Printing a double crisscross in a support bath.

### **Supplementary Movie 10.**

Printing concentric spheres in a support bath.

### **Supplementary Movie 11.**

Printing of a human hand.

### **Supplementary Movie 12.**

Confocal image of a lumen entry.

### **Supplementary Movie 13.**

Tripod perfusion.

### **Supplementary Movie 14.**

Printing a heart in a support bath.

**Supplementary Movie 15.**

Manipulation of the printed heart in PBS after extraction.

**Supplementary Movie 16.**

Perfusion through the printed heart.

**Supplementary Movie 17.**

A printed cellularized heart, CM (pink), EC (orange).

**Supplementary Movie 18.**

Confocal image of printed heart compartments.
